# Supplementary material for: Understanding the role of GRE3 in the erythritol biosynthesis pathway in Saccharomyces uvarum and its implication in osmoregulation and redox homeostasis
Source: PubMed Central journal article supplement — Microb Biotechnol. 2023 Jul 14;16(9):1858–71. doi: 10.1111/1751-7915.14313 (PMC10443344; doi:10.1111/1751-7915.14313), 2023-07-14
Supplement: MBT2-16-1858-s001.pdf [file MBT2-16-1858-s001.pdf]

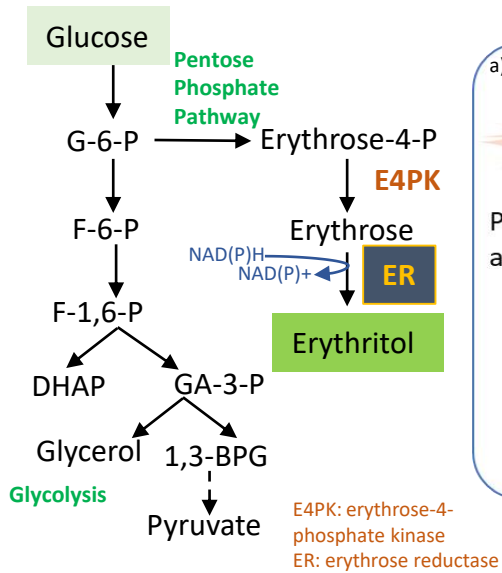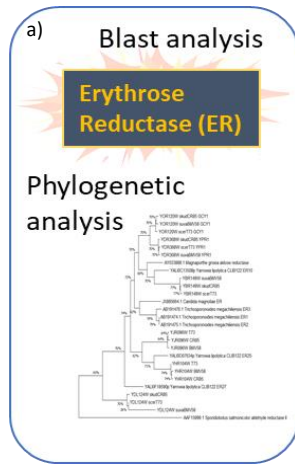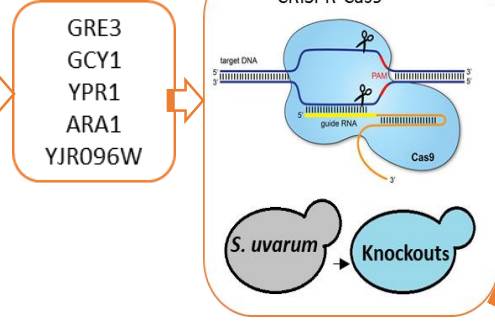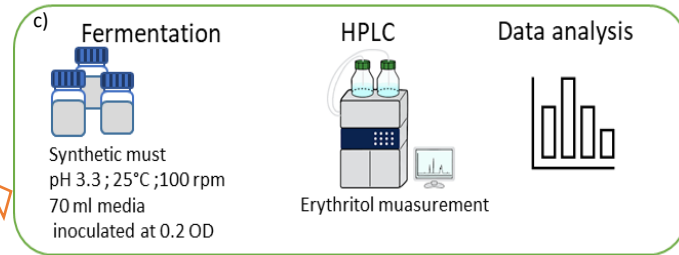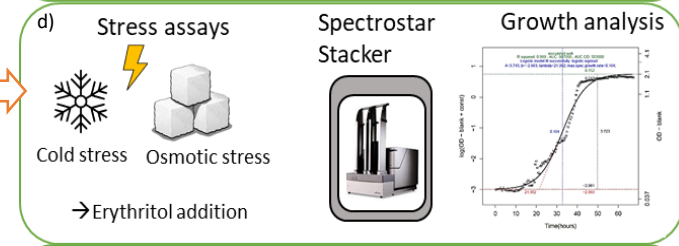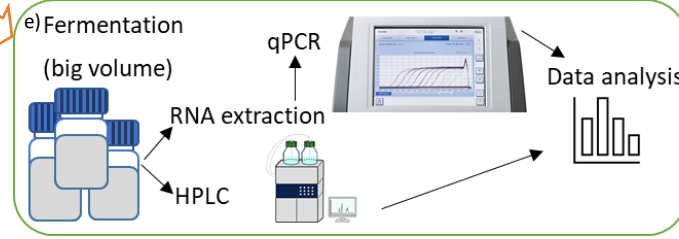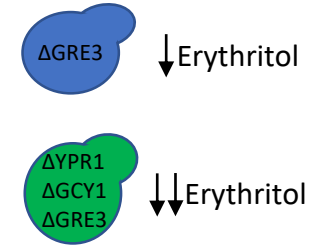

+Erythritol → Stress tolerance

GRE3: highest expression in BMV58 at stationary phase

Erythritol increased its production at stationary phase

Different cofactor balance based on metabolite production
