# Supplementary material for: Understanding the role of GRE3 in the erythritol biosynthesis pathway in Saccharomyces uvarum and its implication in osmoregulation and redox homeostasis
Source: PubMed Central journal article supplement — Microb Biotechnol. 2023 Jul 14;16(9):1858–71. doi: 10.1111/1751-7915.14313 (PMC10443344; doi:10.1111/1751-7915.14313), 2023-07-14
Supplement: MBT2-16-1858-s002.pdf [file MBT2-16-1858-s002.pdf]

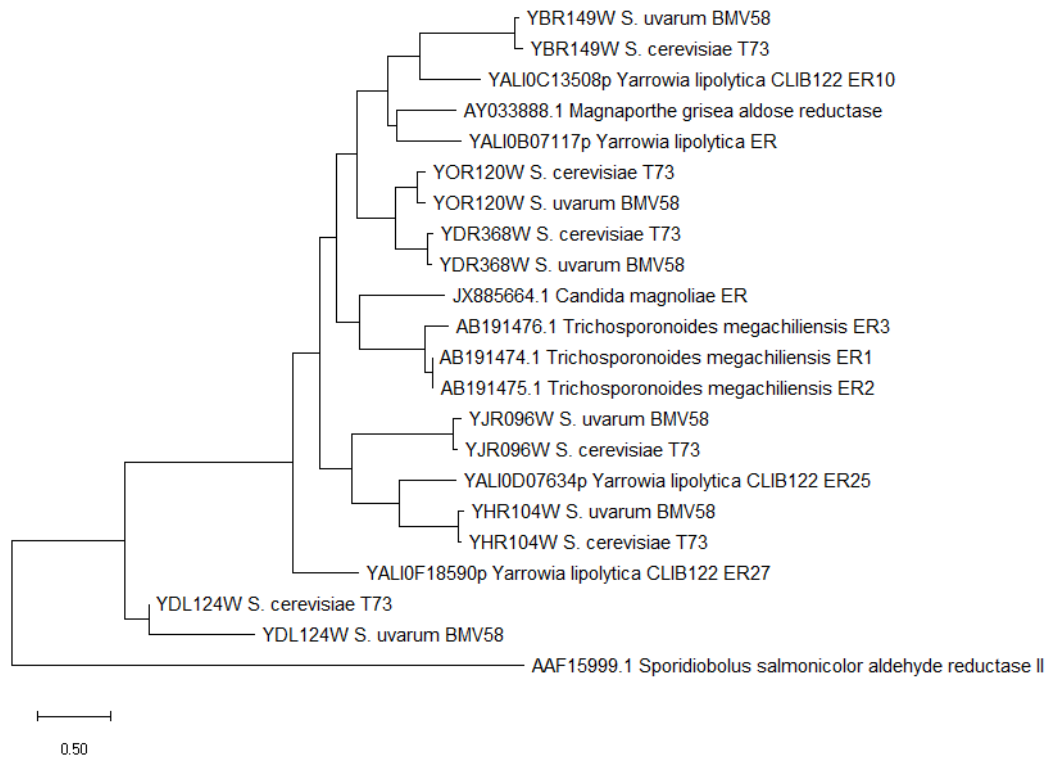

**Figure S1.** Phylogenetic analysis of AKRs including the putative ERs *GCY1*, *YPR1*, *GRE3*, *ARA1*, *YJR096W*, and *YDL124W* of *S.cerevisiae*, *S. kudriavzevii* and *S.uvarum*; the described ERs from *Magnaporthe grisea*, *Yarrowia lipolytica*, *Trichosporonoides megachiliensis*, *Candida magnoliae* and the aldehyde reductase of *Sporidiobolus salmonicolor*.

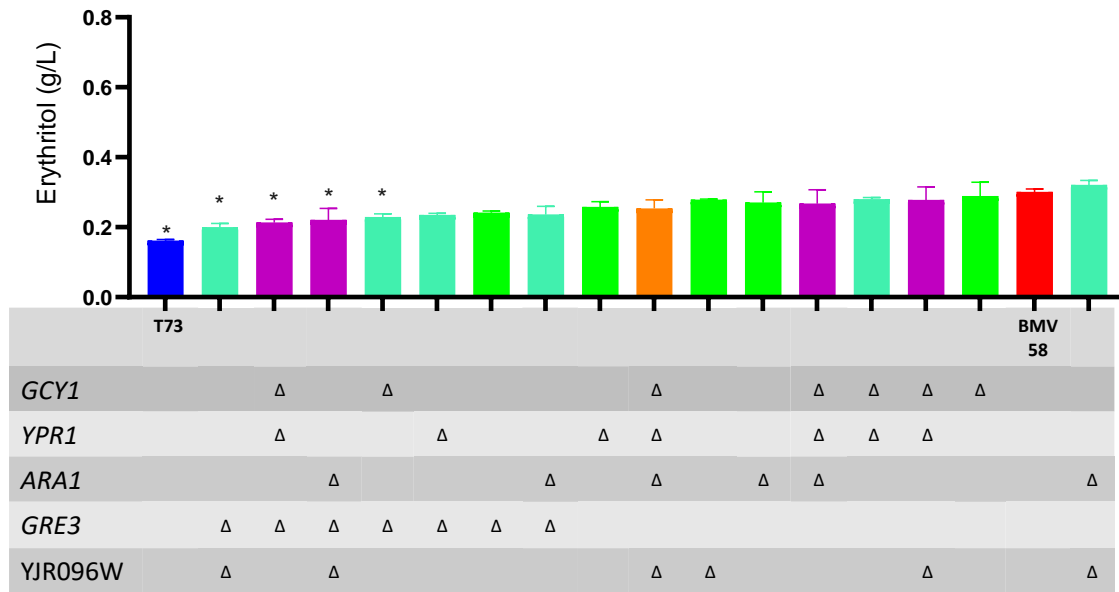

**Figure S2.** Concentration of erythritol produced by *S. cerevisiae* T73 (dark blue), *S. uvarum* BMV58 (red) as WT, the single mutants (green), double mutants (light blue), triple mutants (purple), quadruple mutant (orange) and quintuple mutant, with all selected genes deleted (black). This concentration was measured after fermentation on SM with 200 g/L glucose + fructose and 200 mg/L YAN. Standard deviation is shown, and the asterisk represents significant differences at the level of 0.05 in comparison with the WT (BMV58).

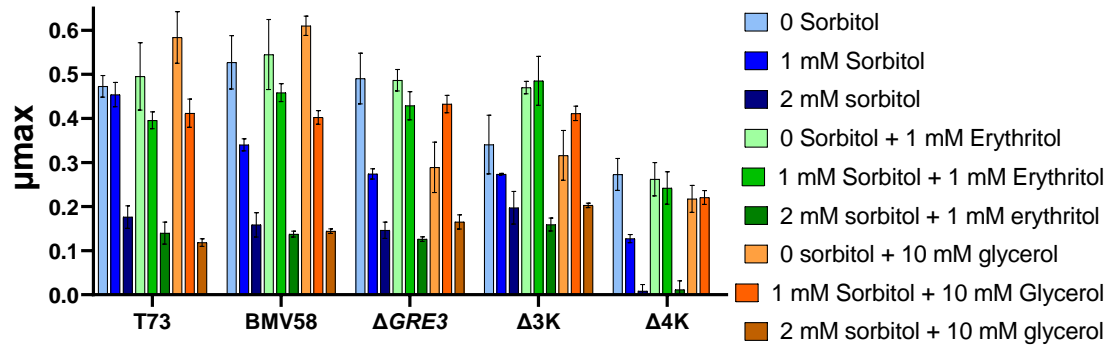

**Figure S3.**  $\mu_{\max}$  (log. OD/h) of *S. cerevisiae* (T73), *S. uvarum* (BMV58), BMV58 mutants  $\Delta GRE3$ ,  $\Delta YJR096W$ ,  $\Delta YPR1\Delta GCY1\Delta GRE3$  ( $\Delta 3K$ ), and  $\Delta YPR1\Delta GCY1\Delta ARA1\Delta YJR096W$  (4K) in YNB at 25°C without sorbitol and with different concentrations of sorbitol, as well as sorbitol and the addition of erythritol or glycerol. Values represents media of biological triplicates and standard deviation is shown.

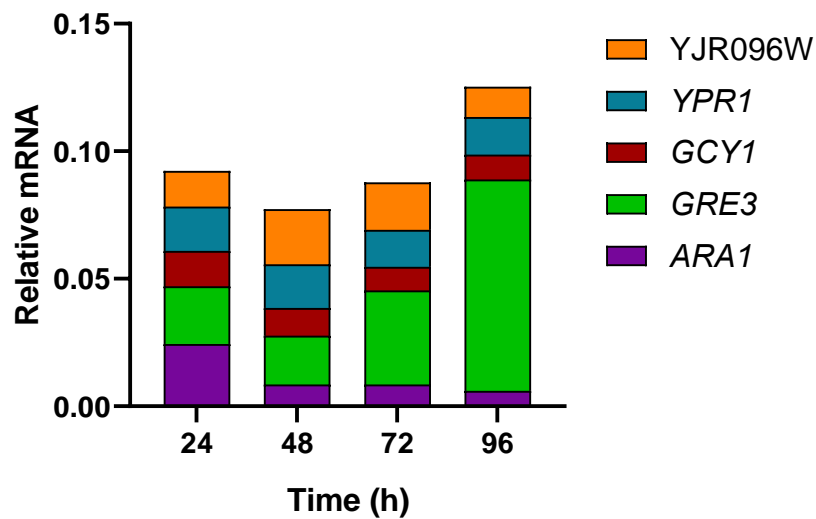

**Figure S4.** Representation of the level of expression of the selected genes (*YJR096W*, *YPR1*, *GCY1*, *GRE3* and *ARA1*) at 24, 48, 72 and 96 hours of fermentation (SM with 240 g/L sugars and 300 mg/L YAN) by *S. uvarum* BMV58. The values represent media of biological and technical triplicates.

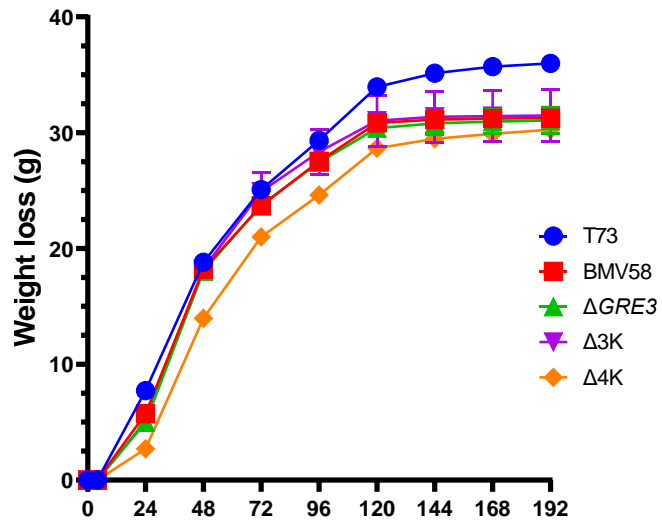

**Figure S5.** Growth of the strains *S. cerevisiae* T73 (blue), *S. uvarum* BMV58 (red),  $\Delta GRE3$  (green),  $\Delta YPR1\Delta GCY1\Delta GRE3$  ( $\Delta 3K$ , pink), and  $\Delta YPR1\Delta GCY1\Delta ARA1\Delta YJR096W$  (4K, orange) along the fermentation on 240 g/L and 300 YAN.

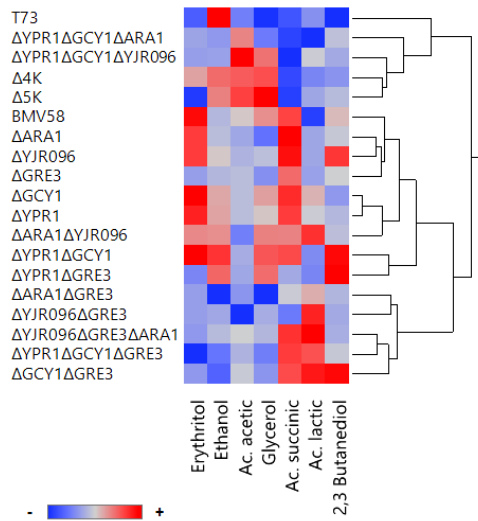

**Figure S6.** Heat map of *S. cerevisiae* T73, *S. uvarum* BMV58 and BMV58 mutants showing the media of the concentration of the main metabolites produced after fermentation on SM with 240 g/L glucose + fructose and 300 YAN. The colours goes from blue (low concentration) to red (high concentration).

**Table S1.** Primers used to knock out the selected genes by CRISPR-Cas9 in BMV58 and the primers used to prove the deletion.

| Primer name         | Sequence (5' to 3')                                                                          | Utilization                                                   |
|---------------------|----------------------------------------------------------------------------------------------|---------------------------------------------------------------|
| gRNA-GCY1-BMV58_Fw  | TGATATAGTTTGGATCTAAGGTTTTAGAGCTAGAAATAGCAAGTTAA<br>AATAAGG                                   | gRNA to guide Cas9 for deletion of YOR120W in BMV58           |
| gRNA-GCY1-BMV58_Rv  | CTTAGATCCAAACTATATCAGATCATTATCTTTCACTGCGGAG                                                  | gRNA to guide Cas9 for deletion of YOR120W in BMV58 (reverse) |
| DR-GCY1-BMV58       | CTCAAGCTAGAAGTTAATATAGCACTATCACAAACTTAGAAAATAG<br>TCGTACCTATGTTTTCGAAACAACCAAGACATTTAGCTAA   | Donor DNA for YOR120W deletion                                |
| DR-GCY1-BMV58_Rv    | TTAGCTAAATGTCTTGGTTGTTTCGAAAACATAGGTACGACTATTTTC<br>TAAGTTTTGTGATAGTGCTATATTAACCTTCTAGCTTGAG | Reverse complement of previous single DNA strand              |
| Check_GCY1-BMV58_Fw | ATTGGCATGCTTTCACCATA                                                                         | Forward control PCR for YOR120W-BMV58 deletion                |
| Check_GCY1-BMV58_Rv | CTCGTTGCTCGACATTTTCAT                                                                        | Reverse control PCR for YOR120W-BMV58 deletion                |
| gRNA-YPR1-BMV58_Fw  | TCGACGTTGACACCAAGGAAGTTTTAGAGCTAGAAATAGCAAGTTA<br>AAATAAGG                                   | gRNA to guide Cas9 for deletion of YDR368W in BMV58           |
| gRNA-YPR1-BMV58_Rv  | TTCCTTGGTGTCAACGTCGAGATCATTATCTTTCACTGCGGAG                                                  | gRNA to guide Cas9 for deletion of YDR368W in BMV58 (reverse) |
| DR-YPR1-BMV58       | CATTGATTTTCATTGCTCAAAGTACGCTTATATAGTAATTGACCTGAAC<br>AAGCTACGTCACAGCAGATAGCTTGAATTTCTTTACT   | Donor DNA for YDR368W deletion                                |
| DR-YPR1-BMV58_Rv    | AGTAAAGGAAATTCAGCTATCTGCTGTGACGTAGCTTGTTCAGGTC<br>AATTACTATATAAGCGTACTTTGAGCAATGAAATCAATG    | Reverse complement of previous single DNA strand              |
| Check_YPR1-BMV58_Fw | TGATGCTTTCATGCTTGCT                                                                          | Forward control PCR for YDR368W-BMV58 deletion                |
| Check_YPR1-BMV58_Rv | GGACGGCTTTGAATTGGTTA                                                                         | Reverse control PCR for YDR368W-BMV58 deletion                |
| gRNA-Gre3-BMV58_Fw  | GGTGCAGAGGACGACAAGAGGTTTTAGAGCTAGAAATAGCAAGTT<br>AAAATAAGG                                   | gRNA to guide Cas9 for deletion of YHR104W in BMV58           |
| gRNA-Gre3-BMV58_Rv  | CTCTTGTCGTCCTCTGCACCGATCATTATCTTTCACTGCGGAG                                                  | gRNA to guide Cas9 for deletion of YHR104W in BMV58 (reverse) |
| DR-Gre3-BMV58       | TCGTAGCTAGCATACCCCAAAAAAAAAAAAAAAAAAGAGAAATCAAATAA<br>TTAACCAATGACGGATATGAGCATACCTCCCTTACTTC | Donor DNA for YHR104W deletion                                |
| DR-Gre3-BMV58_Rv    | GAAGTAAAGGGAGGTATGCTCATATCCGTCATTGGGTTAATTATTTG<br>AATTTCTCTTTTTTTTTTTTTGGGGTATGCTAGCTACGA   | Reverse complement of previous single DNA strand              |
| Check_Gre3-BMV58_Fw | TTGTCAACCATAACAACAGCA                                                                        | Forward control PCR for YHR104W-BMV58 deletion                |
| Check_Gre3-BMV58_Rv | GGAAACAGCACATTCAACACTT                                                                       | Reverse control PCR for YHR104W-BMV58 deletion                |
| gRNA-Ara1-BMV58_Fw  | AGAGGGTCTATCAAAGGGGTTTTAGAGCTAGAAATAGCAAGTTA<br>AAATAAGG                                     | gRNA to guide Cas9 for deletion of YBR149W in BMV58           |
| gRNA-Ara1-BMV58_Rv  | CCCTTTTGATAGAACCCTCTGATCATTATCTTTCACTGCGGAG                                                  | gRNA to guide Cas9 for deletion of YBR149W in BMV58 (reverse) |
| DR-Ara1-BMV58       | TTCAATTTGATAAAAAAAAAAGTTTGCTCTCAATCAACATCATCTAGG<br>GTCCTTGAGACTCAGTTTATATCTATCGACCTTATTTT   | Donor DNA for YBR149W deletion                                |

|                        |                                                                                        |                                                               |
|------------------------|----------------------------------------------------------------------------------------|---------------------------------------------------------------|
| DR-Ara1-BMV58_Rv       | AAAATAAAGGTCGATAGATATAAACTGAGTCTCAAGGACCCTAGATGATGTTGATTGAGAGCAAACCTTTTTTTTATCAAATTGAA | Reverse complement of previous single DNA strand              |
| Check_Ara1-BMV58_Fw    | GTGCATCTGGAACTCTTCTGTA                                                                 | Forward control PCR for YBR149W-BMV58 deletion                |
| Check_Ara1-BMV58_Rw    | CCAAAAAGGCCTGAGAAACAAT                                                                 | Reverse control PCR for YBR149W-BMV58 deletion                |
| gRNA-YJR096W-BMV58_Fw  | GTCACAGCTGAAACATAAGCGTTTTAGAGCTAGAAATAGCAAGTTAAATAAGG                                  | gRNA to guide Cas9 for deletion of YJR096W in BMV58           |
| gRNA-YJR096W-BMV58_Rv  | GCTTATGTTTCAGCTGTGACGATCATTTATCTTTCCTGCGGAG                                            | gRNA to guide Cas9 for deletion of YJR096W in BMV58 (reverse) |
| DR-YJR096W-BMV58       | GTTTTAAAGTAAAGGAAAAAGGACTAAGTCAGCATCTCTAATTAAAGCGGAACATTGGACCTTGTGTAAACTTATAAACTTTTC   | Donor DNA for YJR096W deletion                                |
| DR-YJR096W-BMV58_Rv    | GAAAAAGTTTATAAGTTTACACAAGGTCCAATGTTCCGCTTTAATTAGAGATGCTGACTTAGTCTTTTTCTTTACTTTAAAAAC   | Reverse complement of previous single DNA strand              |
| Check_YJR096W-BMV58_Fw | TTCATTTCTATCCCTCGCCATC                                                                 | Forward control PCR for YJR096W-BMV58 deletion                |
| Check_YJR096W-BMV58_Rw | CCGGGTAACAGGTTCTACGA                                                                   | Reverse control PCR for YJR096W-BMV58 deletion                |



**Table S2.** Primers used to quantify the expression of the selected genes involved in erythritol and glycerol.

| Primer name      | Sequence (5' to 3')    | Utilization        |
|------------------|------------------------|--------------------|
| Gcy1-Qp_Su_F     | AAGAAGATGGCTCTCGTCCA   | qPCR YOR120W S.u   |
| Gcy1-Qp_Su_R     | CAACCGCCCTCGTCTTATTA   | qPCR YOR120W S.u   |
| Ypr1-Qp_Su_FW    | GAGTGCCAATGCTCCGTTAT   | qPCR YDR368W S.u   |
| Ypr1-Qp_Su_RV    | CGTAGCCTCTTTGGATGCTC   | qPCR YDR368W S.u   |
| Ara1-Qp_Su_FW    | TTGATACCGCTTGGGCTTAC   | qPCR YBR149W S.u   |
| Ara1-Qp_Su_RV    | CCCATAAGACAGGCCACACT   | qPCR YBR149W S.u   |
| Gre3-Qp_Su_FW    | GGACGACAAGAGGGGTCATA   | qPCR YHR104W S.u   |
| Gre3-Qp_Su_RV    | AACCAAGCTCCCTTGGAAAT   | qPCR YHR104W S.u   |
| YJR096W-Qp_Su_FW | TCGTAATCCGGGTCAAGTTC   | qPCR YJR096W S.u   |
| YJR096W-Qp_Su_RV | TTTCATCTGGTCATCCGACA   | qPCR YJR096W S.u   |
| Gcy1-Qp_Sc_F     | AGGATGGTTCTCGTGCAGTG   | qPCR YOR120W S.c   |
| Gcy1-Qp_Sc_R     | TCGACTTGGTTAGCAGCTGG   | qPCR YOR120W S.c   |
| Ypr1-Qp_Sc_FW    | GTGTTGGGTTTCGGCACTTG   | qPCR YDR368W S.c   |
| Ypr1-Qp_Sc_RV    | TGTTCCGTACCCCAAAGCTT   | qPCR YDR368W S.c   |
| Ara1-Qp_Sc_FW    | CAGCACTGGGTTTGGGGAC    | qPCR YBR149W S.c   |
| Ara1-Qp_Sc_RV    | CTCTGTCTCGTAGGCCCAAG   | qPCR YBR149W S.c   |
| Gre3-Qp_Sc_FW    | AACGGTCTGAAAATGCCCTT   | qPCR YHR104W S.c   |
| Gre3-Qp_Sc_RV    | GGCTTTCCTGATACCTTCACCA | qPCR YHR104W S.c   |
| YJR096W-Qp_Sc_FW | TCAAACGGCTTCAAATCCCAA  | qPCR YJR096W S.c   |
| YJR096W-Qp_Sc_RV | ACCATCGCCAACCTTCCTTCT  | qPCR YJR096W S.c   |
| GPD1-qPCR_F      | TGTGGTGCTTTGAAGAACG    | qPCR GPD1 S.c, S.u |
| GPD1-qPCR_R      | GTTTCTTCTCTAGATTCTGG   | qPCR GPD1 S.c, S.u |
| GPD2-qPCR_F      | GTTCCACAGACCWTACTTCC   | qPCR GPD2 S.c, S.u |
| GPD2-qPCR_R      | CCATCCCATACTTCTACG     | qPCR GPD2 S.c, S.u |
| FPS1-qPCR_F      | GTTTTGYGTTTTTCCAAAGC   | qPCR FPS1 S.c, S.u |
| FPS1-qPCR_R      | TGATAAGCCATRGARGCATT   | qPCR FPS1 S.c, S.u |
| STL1-qPCR_F      | GCTTATTGGATTGATTTTGGG  | qPCR STL1 S.c, S.u |
| STL1-qPCR_R      | TGTTAACAGCATCGTGAAGC   | qPCR STL1 S.c, S.u |
| ACT1-qPCR_F      | CATGTTCCAGGTATTGCCG    | qPCR ACT1 S.c, S.u |
| ACT1-qPCR_R      | GCCAAAGCGGTGATTTCTT    | qPCR ACT1 S.c, S.u |
| 18S-qPCR_F       | TTGCGATAACGAACGAGACC   | qPCR 18S S.c, S.u  |
| 18S-qPCR_R       | CATCGGCTTGAAACCGATAG   | qPCR 18S S.c, S.u  |

**Table S3.** *S. cerevisiae* genes with homology to YALI0F18590g ER27 in *Y. lipolytica*.

| Description       | Max Score | Total Score | Query Cover | E value           | Per Ident | Main functions                                                                                                              |
|-------------------|-----------|-------------|-------------|-------------------|-----------|-----------------------------------------------------------------------------------------------------------------------------|
| Gcy1p/<br>YOR120W | 233       | 233         | 86%         | 4e <sup>-74</sup> | 45.49%    | Glycerol dehydrogenase and mRNA binding activity (Jung et al. 2012).                                                        |
| Ypr1p/<br>YDR368W | 229       | 229         | 89%         | 7e <sup>-73</sup> | 45.85%    | Reduces multiple substrates including 2-methylbutyraldehyde and D, L-glyceraldehyde (Chang et al. 2007).                    |
| Gre3p/<br>YHR104W | 176       | 176         | 88%         | 7e <sup>-51</sup> | 33.97%    | Involved in methylglyoxal, D-xylose, arabinose, and galactose metabolism (Träff, Jönsson, and Hahn-Hägerdal 2002).          |
| Ara1p/<br>YBR149W | 160       | 160         | 92%         | 2e <sup>-45</sup> | 34.06%    | Arabinose dehydrogenase dependent of NADP+. It is involved in carbohydrate metabolism (Amako et al. 2006).                  |
| YJR096Wp          | 155       | 155         | 88%         | 2e <sup>-44</sup> | 36.03%    | Xylose and arabinose reductase and involved in the response to DNA damage (Chang et al. 2007).                              |
| YDL124Wp          | 153       | 153         | 88%         | 2e <sup>-43</sup> | 36.60%    | Catalyses the NADPH-dependent reduction of aromatic $\alpha$ -keto amides and $\alpha$ -keto esters (Ishihara et al. 2004). |

**Table S4.** List of the strain names used and the genes that are deleted on BMV58.

|                          | <i>GCY1</i> | <i>YPR1</i> | <i>ARA1</i> | <i>GRE3</i> | <i>YJR096W</i> |
|--------------------------|-------------|-------------|-------------|-------------|----------------|
| <b>ΔGCY1</b>             | Δ           |             |             |             |                |
| <b>ΔYPR1</b>             |             | Δ           |             |             |                |
| <b>ΔARA1</b>             |             |             | Δ           |             |                |
| <b>ΔGRE3</b>             |             |             |             | Δ           |                |
| <b>ΔYJR096</b>           |             |             |             |             | Δ              |
| <b>ΔARA1ΔGRE3</b>        |             |             | Δ           | Δ           |                |
| <b>ΔYJR096ΔGRE3</b>      |             |             |             | Δ           | Δ              |
| <b>ΔARA1ΔYJR096</b>      |             |             | Δ           |             | Δ              |
| <b>ΔYJR096ΔGRE3ΔARA1</b> |             |             | Δ           | Δ           | Δ              |
| <b>ΔYPR1ΔGCY1</b>        | Δ           | Δ           |             |             |                |
| <b>ΔGCY1ΔGRE3</b>        | Δ           |             |             | Δ           |                |
| <b>ΔYPR1ΔGRE3</b>        |             | Δ           |             | Δ           |                |
| <b>Δ3K</b>               | Δ           | Δ           |             | Δ           |                |
| <b>ΔYPR1ΔGCY1ΔARA1</b>   | Δ           | Δ           | Δ           |             |                |
| <b>ΔYPR1ΔGCY1ΔYJR096</b> | Δ           | Δ           |             |             | Δ              |
| <b>Δ4K</b>               | Δ           | Δ           | Δ           |             | Δ              |
| <b>Δ5K</b>               | Δ           | Δ           | Δ           |             | Δ              |

**Table S5.** Erythritol concentrations after fermentation on SM with different sugar and YAN concentrations produced by BMV58,  $\Delta GRE3$ , and  $\Delta YPR1\Delta GCY1\Delta GRE3$ . Values represent media of biological triplicates by total amount (g/L), yield per gram of glucose (g/g) and percentage of erythritol production of the mutants compared with the WT.

| <b>240 g/L glucose and fructose, 300 mg/L YAN</b>     |                         |                         |                     |
|-------------------------------------------------------|-------------------------|-------------------------|---------------------|
|                                                       | <b>Erythritol (g/L)</b> | <b>Erythritol (g/g)</b> | <b>% Erythritol</b> |
| <b>WT (BMV58)</b>                                     | 0,73 ± 0,02             | 0,0032 ± 0,0001         |                     |
| <b><math>\Delta GRE3</math></b>                       | 0,40 ± 0,01             | 0,0018 ± 0,0002         | 55,23               |
| <b><math>\Delta YPR1\Delta GCY1\Delta GRE3</math></b> | 0,21 ± 0,03             | 0,0010 ± 0,0007         | 29,85               |
| <b>240 g/L glucose and fructose, 200 mg/L YAN</b>     |                         |                         |                     |
|                                                       | <b>Erythritol (g/L)</b> | <b>Erythritol (g/g)</b> | <b>% Erythritol</b> |
| <b>WT (BMV58)</b>                                     | 0,55 ± 0,02             | 0,0024 ± 0,0001         |                     |
| <b><math>\Delta GRE3</math></b>                       | 0,40 ± 0,04             | 0,0017 ± 0,0002         | 73,98               |
| <b><math>\Delta YPR1\Delta GCY1\Delta GRE3</math></b> | 0,30 ± 0,01             | 0,0013 ± 0,00001        | 55,97               |
| <b>260 g/L glucose and fructose, 200 mg/L YAN</b>     |                         |                         |                     |
|                                                       | <b>Erythritol (g/L)</b> | <b>Erythritol (g/g)</b> | <b>% Erythritol</b> |
| <b>WT (BMV58)</b>                                     | 0,65 ± 0,03             | 0,0029 ± 0,0001         |                     |
| <b><math>\Delta GRE3</math></b>                       | 0,45 ± 0,04             | 0,0020 ± 0,0002         | 69,01               |
| <b><math>\Delta YPR1\Delta GCY1\Delta GRE3</math></b> | 0,35 ± 0                | 0,0016 ± 0              | 54,41               |
| <b>200 g/L glucose and fructose, 200 mg/L YAN</b>     |                         |                         |                     |
|                                                       | <b>Erythritol (g/L)</b> | <b>Erythritol (g/g)</b> | <b>% Erythritol</b> |
| <b>WT (BMV58)</b>                                     | 0,30 ± 0,009            | 0,0015 ± 0              |                     |
| <b><math>\Delta GRE3</math></b>                       | 0,24 ± 0,01             | 0,0012 ± 0              | 79,98               |
| <b><math>\Delta YPR1\Delta GCY1\Delta GRE3</math></b> | 0,21 ± 0,01             | 0,0011 ± 0              | 69,99               |
| <b>20 g/L glucose, 1.25 g/L eritrosa</b>              |                         |                         |                     |
|                                                       | <b>Erythritol (g/L)</b> | <b>Erythritol (g/g)</b> | <b>% Erythritol</b> |
| <b>WT (BMV58)</b>                                     | 0,466 ± 0.03            | 0,023 ± 0.001           |                     |
| <b><math>\Delta GRP3</math></b>                       | 0,453 ± 0.02            | 0,023 ± 0.001           | 97,21               |

**Table S6.** Metabolite concentrations after fermentation on SM with 240 g/L glucose + fructose and 300 YAN by all the strains. Standard deviation is depicted and significant differences are shown with letters.

|                           | Erythritol                  | Ethanol                               | Ac. Acetic                     | Glycerol                       | Ac. Succinic                    | Ac. L-lactic                      | 2,3-Butanediol              |
|---------------------------|-----------------------------|---------------------------------------|--------------------------------|--------------------------------|---------------------------------|-----------------------------------|-----------------------------|
| <b>T73</b>                | 0,29 ± 0,01 <sup>B</sup>    | 13,49 ± 0,45 <sup>F</sup>             | 0,46 ± 0,02 <sup>A</sup>       | 6,89 ± 0,07 <sup>A</sup>       | 3,99 ± 0,41 <sup>A</sup>        | 0,37 ± 0,02 <sup>A, B, C, D</sup> | 0,47 ± 0,07 <sup>A</sup>    |
| <b>BMV58</b>              | 0,72 ± 0,02 <sup>F, G</sup> | 11,86 ± 0,68 <sup>A, B, C, D, E</sup> | 0,62 ± 0,04 <sup>A, B, C</sup> | 8,08 ± 0,65 <sup>B, C</sup>    | 14,88 ± 0,78 <sup>E, F, G</sup> | 0,22 ± 0,01 <sup>A</sup>          | 1,22 ± 0,05 <sup>B, C</sup> |
| <b>ΔGCY1</b>              | 0,75 ± 0,01 <sup>G</sup>    | 12,33 ± 0,36 <sup>B, C, D, E, F</sup> | 0,57 ± 0,04 <sup>A, B</sup>    | 7,99 ± 0,27 <sup>A, B, C</sup> | 15,56 ± 0,55 <sup>E, F, G</sup> | 0,53 ± 0,02 <sup>C, D, E</sup>    | 0,92 ± 0,14 <sup>B</sup>    |
| <b>ΔYPR1</b>              | 0,69 ± 0,03 <sup>E, F</sup> | 12,36 ± 0,33 <sup>B, C, D, E, F</sup> | 0,57 ± 0,01 <sup>A, B</sup>    | 7,81 ± 0,25 <sup>A, B, C</sup> | 15,09 ± 0,19 <sup>E, F, G</sup> | 0,48 ± 0,05 <sup>C, D</sup>       | 1,05 ± 0,32 <sup>B</sup>    |
| <b>ΔARA1</b>              | 0,66 ± 0,04 <sup>E</sup>    | 11,91 ± 0,41 <sup>A, B, C, D, E</sup> | 0,53 ± 0,04 <sup>A, B</sup>    | 7,24 ± 0,69 <sup>A, B</sup>    | 17,29 ± 0,35 <sup>G</sup>       | 0,41 ± 0,01 <sup>B, C, D</sup>    | 1,12 ± 0,36 <sup>B</sup>    |
| <b>ΔGRE3</b>              | 0,4 ± 0,01 <sup>C</sup>     | 11,85 ± 0,31 <sup>A, B, C, D, E</sup> | 0,57 ± 0,02 <sup>A, B, C</sup> | 7,4 ± 0,19 <sup>A, B</sup>     | 13,77 ± 0,3 <sup>E, F</sup>     | 0,4 ± 0,01 <sup>B, C, D</sup>     | 1,15 ± 0,07 <sup>B</sup>    |
| <b>ΔYJR096W</b>           | 0,66 ± 0 <sup>E</sup>       | 12,13 ± 0,32 <sup>B, C, D, E</sup>    | 0,55 ± 0,02 <sup>A, B</sup>    | 7,66 ± 0,18 <sup>A, B</sup>    | 16,35 ± 0,21 <sup>F, G</sup>    | 0,41 ± 0,01 <sup>B, C, D</sup>    | 1,58 ± 0,01 <sup>C, D</sup> |
| <b>ΔARA1ΔGRE3</b>         | 0,4 ± 0,02 <sup>C</sup>     | 10,67 ± 0,47 <sup>A</sup>             | 0,5 ± 0,01 <sup>A</sup>        | 6,87 ± 0,19 <sup>A</sup>       | 10,47 ± 0,21 <sup>C, D</sup>    | 0,54 ± 0,03 <sup>D, E, F</sup>    | 1,04 ± 0,02 <sup>B</sup>    |
| <b>ΔYJR096WΔGRE3</b>      | 0,4 ± 0,01 <sup>C</sup>     | 11,72 ± 0,16 <sup>A, B, C, D</sup>    | 0,32 ± 0,28 <sup>A</sup>       | 7,56 ± 0,09 <sup>A, B</sup>    | 6,04 ± 3,34 <sup>B</sup>        | 0,75 ± 0,03 <sup>G</sup>          | 0,99 ± 0,02 <sup>B</sup>    |
| <b>ΔARA1ΔYJR096W</b>      | 0,57 ± 0,02 <sup>D</sup>    | 12,49 ± 0,14 <sup>C, D, E, F</sup>    | 0,46 ± 0,05 <sup>A</sup>       | 8,14 ± 0,01 <sup>B, C</sup>    | 13,04 ± 0,7 <sup>D, E</sup>     | 0,73 ± 0,04 <sup>F, G</sup>       | 1,08 ± 0,09 <sup>B</sup>    |
| <b>ΔYJR096WΔGRE3ΔARA1</b> | 0,39 ± 0,01 <sup>C</sup>    | 11,88 ± 0,15 <sup>A, B, C, D, E</sup> | 0,6 ± 0,01 <sup>A, B, C</sup>  | 7,61 ± 0,05 <sup>A, B</sup>    | 15,38 ± 0,17 <sup>E, F, G</sup> | 0,83 ± 0,01 <sup>G</sup>          | 1,01 ± 0,15 <sup>B</sup>    |
| <b>ΔYPR1ΔGCY1</b>         | 0,75 ± 0,01 <sup>G</sup>    | 13,06 ± 0,06 <sup>E, F</sup>          | 0,54 ± 0,01 <sup>A, B</sup>    | 8,35 ± 0,09 <sup>B, C</sup>    | 14,64 ± 0,39 <sup>E, F, G</sup> | 0,36 ± 0,01 <sup>A, B, C</sup>    | 1,71 ± 0,01 <sup>D</sup>    |
| <b>ΔGCY1ΔGRE3</b>         | 0,39 ± 0,03 <sup>C</sup>    | 11,12 ± 0,7 <sup>A, B</sup>           | 0,59 ± 0,04 <sup>A, B, C</sup> | 7,43 ± 0,4 <sup>A, B</sup>     | 14,66 ± 0,33 <sup>E, F, G</sup> | 0,77 ± 0,02 <sup>G</sup>          | 1,71 ± 0,01 <sup>D</sup>    |
| <b>ΔYPR1ΔGRE3</b>         | 0,36 ± 0,02 <sup>C</sup>    | 12,74 ± 0,35 <sup>D, E, F</sup>       | 0,53 ± 0,02 <sup>A, B</sup>    | 8,24 ± 0,05 <sup>B, C</sup>    | 8,67 ± 0,24 <sup>B, C</sup>     | 0,35 ± 0,01 <sup>A, B, C</sup>    | 1,78 ± 0,02 <sup>D</sup>    |
| <b>ΔYPR1ΔGCY1ΔGRE3</b>    | 0,21 ± 0,03 <sup>A</sup>    | 11,28 ± 0,21 <sup>A, B, C</sup>       | 0,55 ± 0,04 <sup>A, B</sup>    | 7,3 ± 0,12 <sup>A, B</sup>     | 15,1 ± 0,2 <sup>E, F, G</sup>   | 0,68 ± 0,06 <sup>E, F, G</sup>    | 1,12 ± 0,05 <sup>B</sup>    |
| <b>ΔYPR1ΔGCY1ΔARA1</b>    | 0,41 ± 0,01 <sup>C</sup>    | 11,59 ± 0,41 <sup>A, B, C, D</sup>    | 0,75 ± 0,2 <sup>B, C, D</sup>  | 7,28 ± 1,08 <sup>A, B</sup>    | 3,04 ± 0,18 <sup>A</sup>        | 0,19 ± 0,23 <sup>A, B</sup>       | 1,09 ± 0 <sup>B</sup>       |
| <b>ΔYPR1ΔGCY1ΔYJR096W</b> | 0,4 ± 0,02 <sup>C</sup>     | 11,66 ± 0,48 <sup>A, B, C, D</sup>    | 1,04 ± 0,06 <sup>E</sup>       | 8,21 ± 0,29 <sup>B, C</sup>    | 1,93 ± 0,32 <sup>A</sup>        | 0,48 ± 0,04 <sup>C, D</sup>       | 0,99 ± 0,1 <sup>B</sup>     |
| <b>Δ4K</b>                | 0,54 ± 0,02 <sup>D</sup>    | 12,71 ± 0,22 <sup>D, E, F</sup>       | 0,83 ± 0,01 <sup>C, D, E</sup> | 8,39 ± 0,16 <sup>B, C</sup>    | 3,34 ± 0,01 <sup>A</sup>        | 0,35 ± 0 <sup>A, B, C</sup>       | 0,9 ± 0,04 <sup>B</sup>     |
| <b>Δ5K</b>                | 0,23 ± 0,01 <sup>A</sup>    | 12,57 ± 0,23 <sup>D, E, F</sup>       | 0,88 ± 0,03 <sup>D, E</sup>    | 8,86 ± 0,06 <sup>C</sup>       | 2,81 ± 0,31 <sup>A</sup>        | 0,41 ± 0,04 <sup>B, C, D</sup>    | 1,06 ± 0,01 <sup>B</sup>    |
